# Supplementary material for: Integrating commercial graphite with network-like carbon fibers for high-rate and long-term cycling K+-storage
Source: Royal Society of Chemistry journal article supplement (doi:10.1039/d4cc03346a), 2024-01-01
Supplement: d4cc03346a1.pdf [file d4cc03346a1.pdf]

## Electronic Supplementary Information

### **Integrating commercial graphite with network-like carbon fibers for high-rate and long-cycling K<sup>+</sup>-storage**

*Jiao Peng, Xueying Liang, Zhifei Mao, Rui Wang, Beibei He, Jun Jin, Yansheng*

*Gong, and Huanwen Wang\**

*Engineering Research Center of Nano-Geomaterials of Ministry of Education, Faculty*

*of Material and Chemistry, China University of Geosciences, Wuhan, 430074, China. E-*

*mail: [wanghw@cug.edu.cn](mailto:wanghw@cug.edu.cn)*

## Experimental section

**Materials synthesis:** Firstly, 0.2 g zinc nitrate hexahydrate ( $\text{Zn}(\text{NO}_3)_2 \cdot 6\text{H}_2\text{O}$ ) was added into 10 mL N, N-dimethylformamide (DMF) and completely dissolved, then 1 g PAN and 0.6 g spherical graphite were added to the above solution and ultrasonically dispersed for 30 min and then placed on a magnetic stirring table for 12 h at a speed of 500 rpm to obtain a dispersed black solution. Using an electrostatic spinner, the distance between the needle and the receiver was set at 18 cm, the voltage was 20 kV, the solution was advanced at a rate of  $1 \text{ mL h}^{-1}$ , the syringe translation distance was 80 mm, the translation speed was set at  $40 \text{ mm min}^{-1}$  and the receiver rotation speed was set at 60 rpm. The resulting film was removed and placed in a blower at  $80 \text{ }^\circ\text{C}$  for 12 h. The dried spun filaments were placed in a muffle furnace and cured by annealing at  $200 \text{ }^\circ\text{C}$  for 2 h at a temperature increase rate of  $0.5 \text{ }^\circ\text{C min}^{-1}$  (denoted as Gr@PAN). Subsequently, black flexible films (referred to as Gr@CNF) were carbonized at high temperature for 2 h under an Ar atmosphere by ramping up to  $800 \text{ }^\circ\text{C}$  at a rate of  $1 \text{ }^\circ\text{C min}^{-1}$ . The obtained membrane is washed by 1M HCl. For comparison, carbon fiber films without the addition of spherical graphite with  $\text{Zn}(\text{NO}_3)_2 \cdot \text{H}_2\text{O}$  (denoted as CNF) were prepared by the same procedure. The Gr/CNF composite was prepared by ball-milling spherical graphite with carbon fibers at 300 rpm for two hours.

**Materials Characterization:** The crystal structure and morphology of the as-prepared electrocatalysts were characterized by X-ray diffraction (XRD, Bruker, D8 Advance) with Cu K $\alpha$  radiation ( $\lambda = 0.15418 \text{ nm}$ ) as an X-ray source, scanning electron microscopy (SEM, SU 3500) with 15 kV working voltage. Raman spectroscopy was obtained using the WITec system (alpha 300 R with a 532 nm wavelength laser). Nitrogen adsorption/desorption isotherms were collected from the samples, and the specific surface areas were calculated by the multipoint Brunauer–Emmett–Teller (BET) procedure. The surface electronic configuration of samples was determined by X-ray photoelectron spectroscopy (XPS, ESCALAB 250Xi).

**Electrochemical tests:** Spherical graphite, Super P and polyvinylidene fluoride (PVDF) binder were mixed in a mass ratio of 8: 1:1 in N-methylpyrrolidone (NMP) and the paste was coated on copper foil to prepare anode and was dried in a vacuum oven at  $80 \text{ }^\circ\text{C}$  for 12 h and then cut into small discs of 12 mm diameter to be used as electrode pieces. The average active substance loading of the negative electrode was about  $1.2 \text{ mg cm}^{-2}$ . Gr @CNF and CNF can be used directly as anode electrode. Electrolyte using 0.8M KPF<sub>6</sub>/EC/DEC.

Galvanostatic charge-discharge and galvanostatic intermittent titration technique (GITT) tests were performed using a LAND battery test system over a voltage range of 0.01-3.0 V (vs K<sup>+</sup>/K). For the GITT tests, cells were discharged at 25 mA g<sup>-1</sup> for 20 min, followed by open-circuit relaxation for 2 h, and this process was continued until the potential was ≤ 0.01 V. Cyclic voltammogram (CV) profiles were scaled in a potential range of 0.01-2.5 V (vs. K<sup>+</sup>/K) on a CHI750E electrochemical workstation. Electrochemical impedance spectroscopy (EIS) tests were performed on a Reference 3000 Gamry with a recording range of 0.1 Hz-100 kHz and an amplitude of 0.5 mV. All tests are conducted at room temperature.

The energy density and power density are calculated by using equations:  $P = \Delta E_i / m$  and  $E = Pt$ , where  $\Delta E = (E_{max} + E_{min}) / 2$ ,  $V_{max}$  and  $V_{min}$  are the beginning and end of the potential in the discharge curve,  $I$  is the charge-discharge current (A),  $t$  is the discharge time (h), and  $m$  is the mass of the active material, including both anode and cathode.

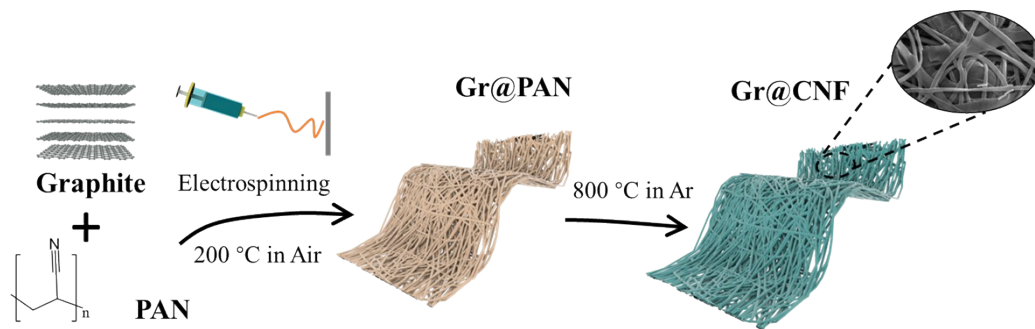

**Figure S1.** Schematic diagram of Gr@CNF synthesis by electrostatic spinning.

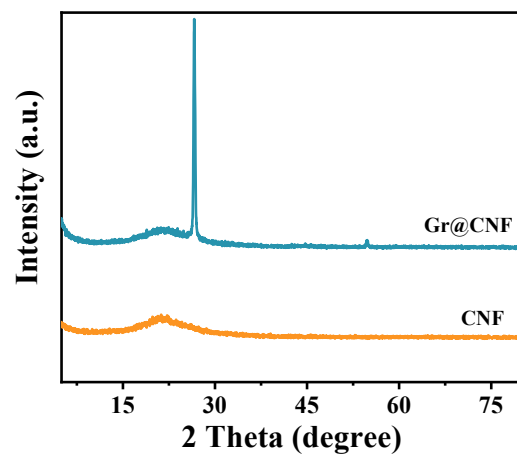

**Figure S2.** XRD patterns of Gr@CNF and CNF.

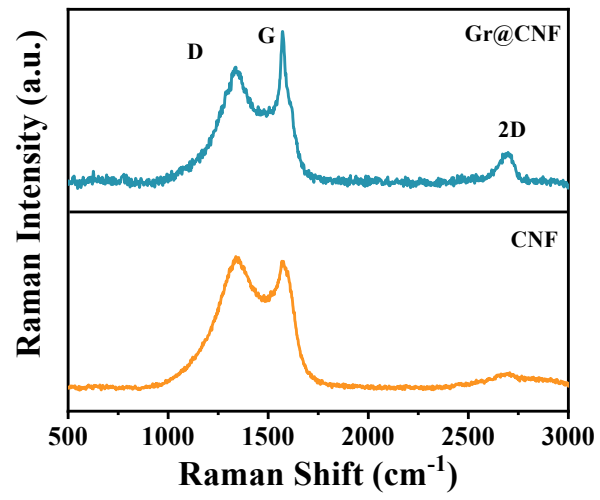

**Figure S3.** The Raman spectra of Gr@CNF and CNF.

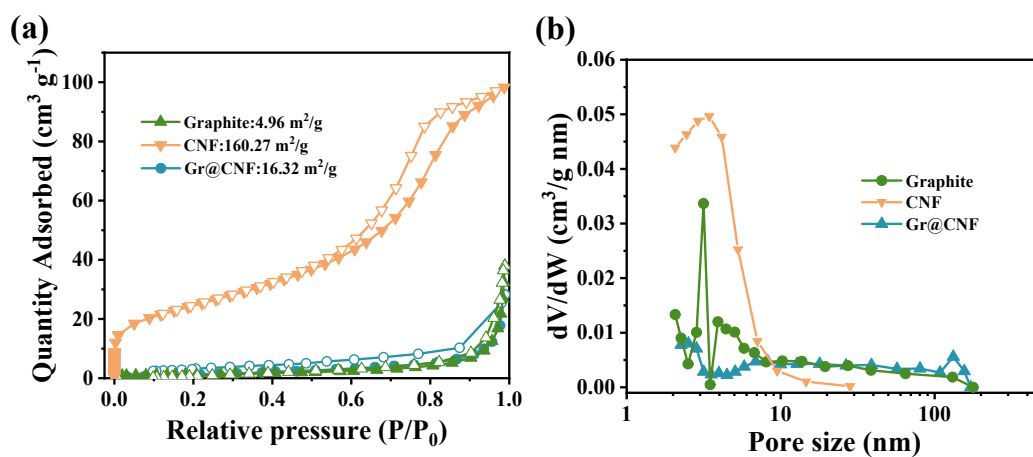

**Figure S4.** The N<sub>2</sub> adsorption and desorption curves and pore size distribution.

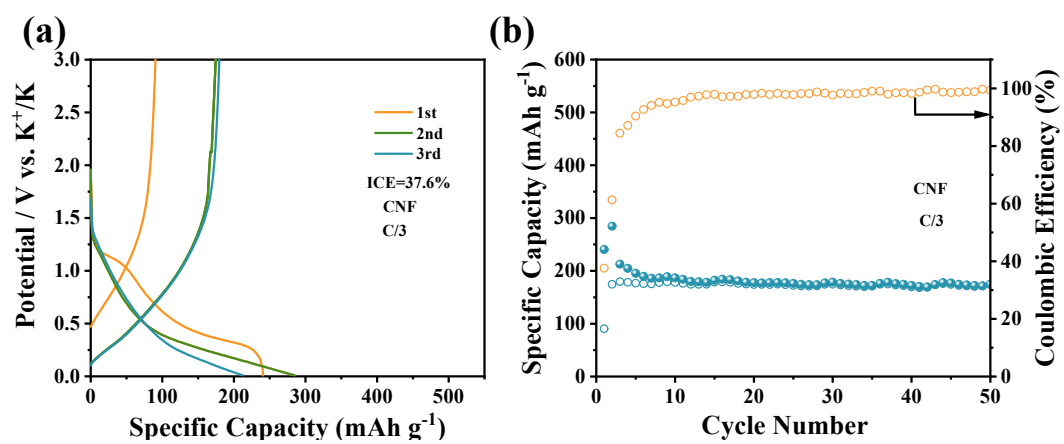

Figure S5. The GCD curves and 50 cycles of CNF at the current density of C/3.



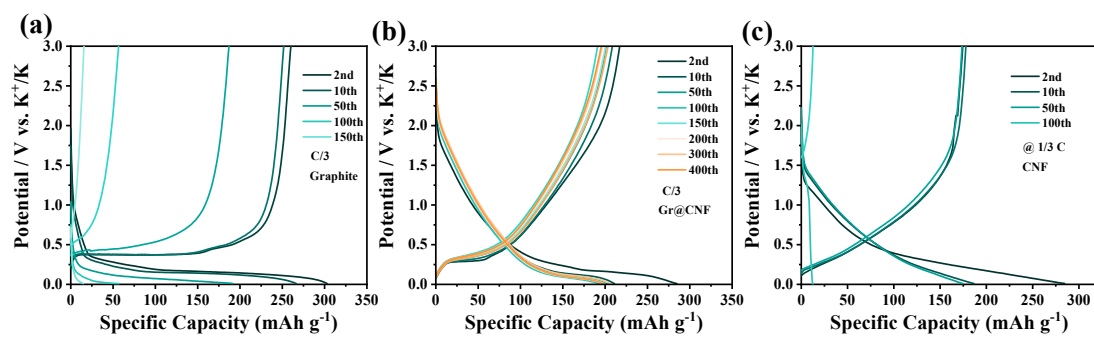

**Figure S6.** GCD curves with different number of turns of three electrodes cycled at a current density of C/3: (a) Graphite; (b) Gr@CNF; (c) CNF.

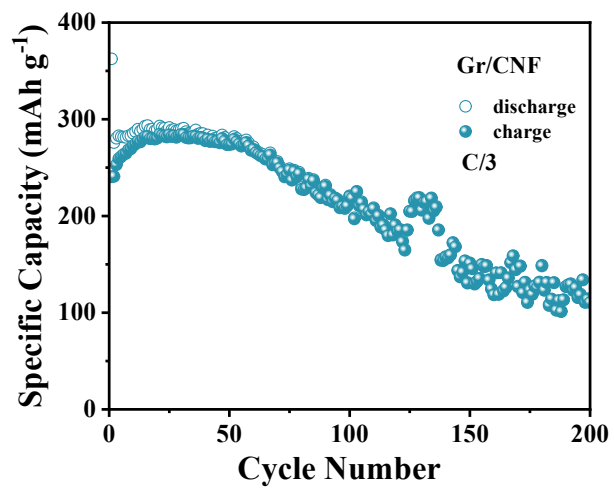

**Figure S7.** 200 cycles of Gr/CNF at the current density of C/3.

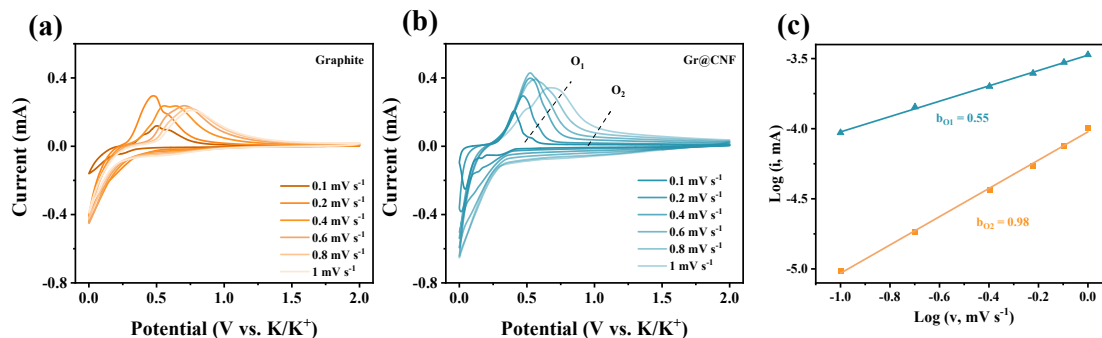

**Figure S8.** CV curves for two electrodes at different scan rates and b-values calculated from the curves.

Note to S8: Both materials show obvious reduction peaks in the low potential interval, as well as oxidation peaks around 0.5 V. The difference is that the peak shift of the Gr@CNF curves is smaller and the deformation is weaker with the increasing sweep rate. From the relationship between the peak current ( $i$ ) and the scan rate ( $v$ ) ( $i = av^b$ ), the  $b$  value can be calculated to determine the electrochemical behavior of K<sup>+</sup> during cycling.

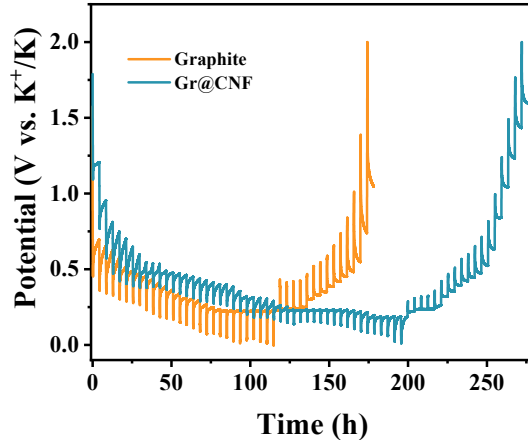

**Figure S9.** GITT curves for the two electrodes.

Note to S9: According to GITT test results,  $D_{K^+}$  can be calculated using the following equation

$$D_{K^+} = \frac{4}{\pi\tau} \left( \frac{m_B V_m}{M_B S} \right)^2 \left( \frac{\Delta E_S}{\Delta E_\tau} \right)^2$$

Where  $\tau$  is the relaxation time,  $m_B$  is the mass of active material,  $M_B$  is the molar mass of active material,  $V_m$  is the molar volume of hard carbon,  $S$  is the surface area of active material,  $\Delta E_S$  and  $\Delta E_\tau$  can be obtained from GITT curves.

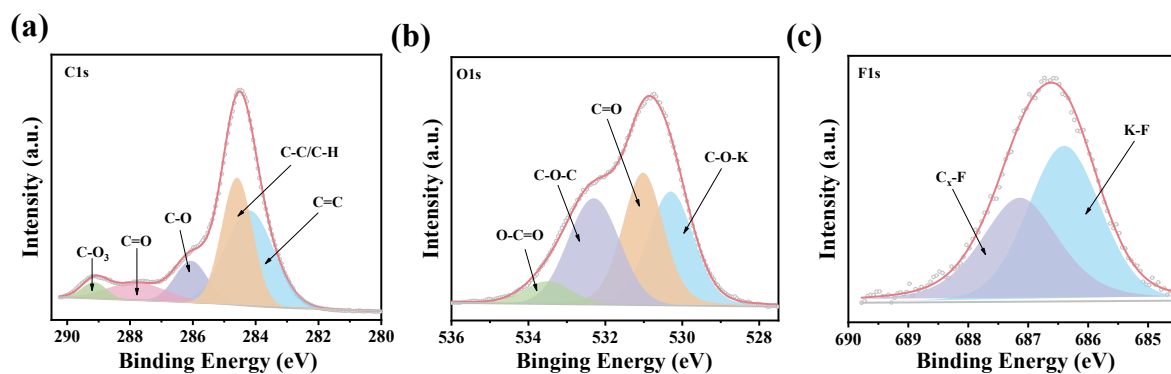

**Figure S10.** XPS spectra of Gr@CNF electrode after 20 cycles: (e) C 1s, (f) O 1s, (g) F 1s. Note to S10: The C-C/C-H, C=C, C-O-C, C-O, C=O and C-O<sub>3</sub> bonds located at 285, 284.2, 285.7, 287.2 and 288.4 eV in the C1s spectra, as well as the O1s spectra showing O-C=O (533.5 eV), -C-O-C- (532.3 eV), C=O (531.4 eV) and -C-O-K (530.3 eV) characteristic peaks, which are mainly due to organic matter produced by solvent decomposition.

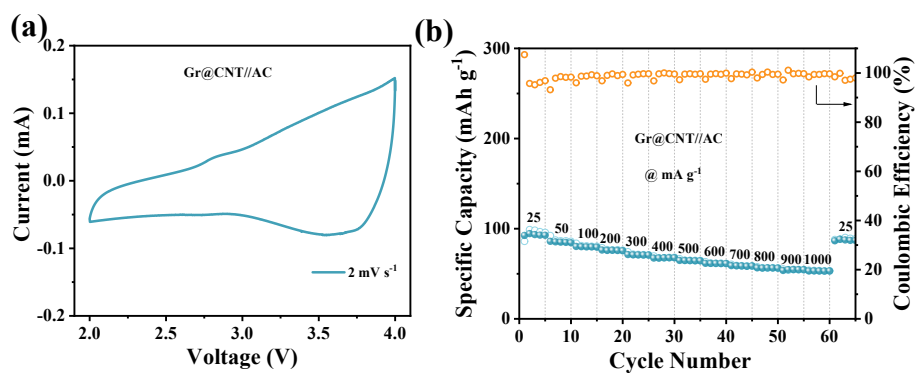

**Figure S11.** (a) CV curve of Gr@CNT//AC at 2 mV s<sup>-1</sup>; (b) Rate performance at different current densities of Gr@CNT//AC.

### Acknowledgement

This work was financially supported by the National Natural Science Foundation of China (No. 22279122), Shenzhen Science and Technology Program (No. JCYJ20220530162402005), and the Research on High Power Flexible Battery in All Sea Depth (2020-XXXX-XX-246-00)
